# Supplementary material for: Perceptions and Intentions to Use E-Health Services in Mental Health Care Settings: A Case Study Among Resident Physicians
Source: Research Square preprint supplement (doi:10.21203/rs.3.rs-7383021/v1), 2025-09-29
Supplement: Supplementary file 1 [file fa4e3b59e47a7dae1d79c8dd.docx]

**Questionnaire: Perceptions and Intentions to Use E-Health Services Among Resident Physicians in Mental Health Care**

This survey is part of a study exploring the intention of resident psychiatrists to use online appointment scheduling systems. We would be grateful if you could complete this questionnaire. Please be assured that your responses will remain anonymous and confidential.

**Section 1: Demographic Information**

1. Are you?

A Woman A Man

1. Your age is:

Under 30 years old Over 30 years old

1. Which year of residency are you currently in?

1st Year 2nd Year 3rd Year 4th Year

**Section 2: Previous Use**

1. Have you ever used an online medical appointment booking service in your daily practice? If no, please proceed to Question 6

Yes No

1. How frequently have you used this service?

Very often Often Sometimes Rare Never

1. Have you ever **personally used** an online medical appointment booking service? If no, please proceed to Question 8

Yes No

1. How frequently have you used this service?

Very often Often Sometimes Rare Never

1. **Indicate the extent to which you agree or disagree with the following statements:**

| **Variables** | **Statements** | **Strongly disagree** | **Disagree** | **Neutral** | **Agree** | **Strongly agree** |
| --- | --- | --- | --- | --- | --- | --- |
| **Section 3: General Factors of Technology Acceptance Models** | | | | | | |
| **Use Intention** | UI1. I intend to use the OMABS in my daily mental health care activities. |  |  |  |  |  |
| UI2. I plan to integrate OMABS into my routine mental health care activities. |  |  |  |  |  |
| **Perceived Usefulness** | PU1. Using the OMABS would lead to more efficient patient appointment scheduling. |  |  |  |  |  |
| PU2. Using the OMABS would improve access to mental healthcare. |  |  |  |  |  |
| PU3. Using the OMABS in my routine would enhance the quality of mental healthcare services. |  |  |  |  |  |
| PU4. Overall, I find the OMABS useful in my daily practice. |  |  |  |  |  |
| **Perceived Ease of Use** | PEOU1. I would find OMABS easy to use. |  |  |  |  |  |
| PEOU2. Learning to use the OMABS is easy for me. |  |  |  |  |  |
| PEOU3. It would be easy for me to become skillful at using the OMABS. |  |  |  |  |  |
| **Social Influence** | SI1.I believe my likelihood of using the OMABS will increase if colleagues around me use it. |  |  |  |  |  |
| SI2. I would feel out of touch if I did not use the OMABS. |  |  |  |  |  |
| **Section 4: Residency Training Factors** | | | | | | |
| **Perceived Workload  and Time Constraints** | PWTC1. Due to time constraints during my shifts, I am unlikely to use OMABS |  |  |  |  |  |
| PWTC2. My clinical workload prevents me from adopting additional tools like OMABS, even if they are useful. |  |  |  |  |  |
| **Perceived Autonomy in Managing Consultations** | PAMC1. I have full autonomy in scheduling and managing patient appointments. |  |  |  |  |  |
| PAMC2. I do not need approval from supervisors to adjust my consultation schedule. |  |  |  |  |  |
| **Perceived Institutional  Support** | PIS1. The hospital provides the necessary resources and support to use OMABS. |  |  |  |  |  |
| PIS2. I can have adequate training and support for using OMABS. |  |  |  |  |  |
| **Medical Curriculum**  **Support** | MCS1. My residency program includes training on the use of digital health technologies. |  |  |  |  |  |
| MCS2. The curriculum underscores technology’s impact on care and efficiency, enhancing my willingness to use OMABS. |  |  |  |  |  |
| **Section 5: Factors Specific to Psychiatric Care** | | | | | | |
| **Complexity of  Psychiatric Care** | CPC1. The psychiatric care process is too complex for an OMABS to be effective. |  |  |  |  |  |
| CPC2. Managing psychiatric patients requires flexible scheduling that OMABS may not provide. |  |  |  |  |  |
| CPC3. Many psychiatric patients may struggle to use an OMABS due to cognitive, emotional, or technological barriers. |  |  |  |  |  |
| CPC4.The absence of direct human interaction in online scheduling concerns me. |  |  |  |  |  |
| **Perceived Security and Reliability** | PSR1. I trust that the OMABS system will securely handle patient information. |  |  |  |  |  |
| PSR. I believe that OMABS is reliable in managing patient appointments. |  |  |  |  |  |

**We sincerely thank you for your cooperation and valuable time**
